# Supplementary material
Source: Springer Nature journal article supplement (https://www.springermedizin.de/resource/supplementary/13023_2013_704_MOESM3_ESM.pdf/9642874)

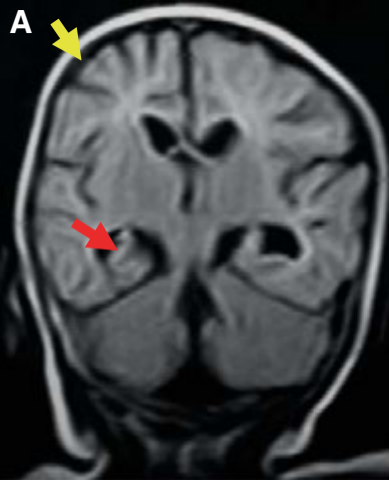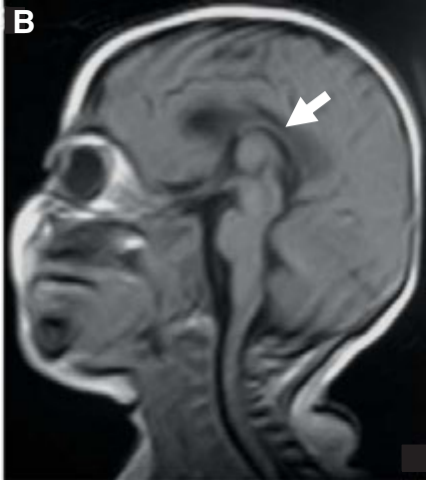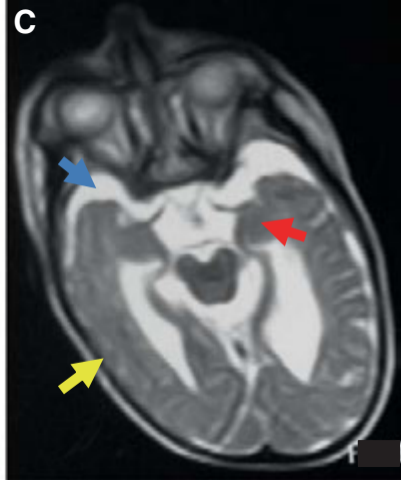

Supplement: MOESM3 [file 9642874]
